# Supplementary material for: miR-193b regulates tumorigenesis in liposarcoma cells via PDGFR, TGFβ, and Wnt signaling
Source: PubMed Central journal article supplement (PMC6397171; doi:10.1038/s41598-019-39560-0), 2019-03-01
Supplement: 41598_2019_39560_MOESM1_ESM.pdf [file 41598_2019_39560_MOESM1_ESM.pdf]

# **miR-193b regulates tumorigenesis in liposarcoma cells via PDGFR, TGF $\beta$ , and Wnt signaling**

Ying Z. Mazzu, Yulan Hu, Yawei Shen, Thomas Tuschl, Samuel Singer

**Supplementary data**

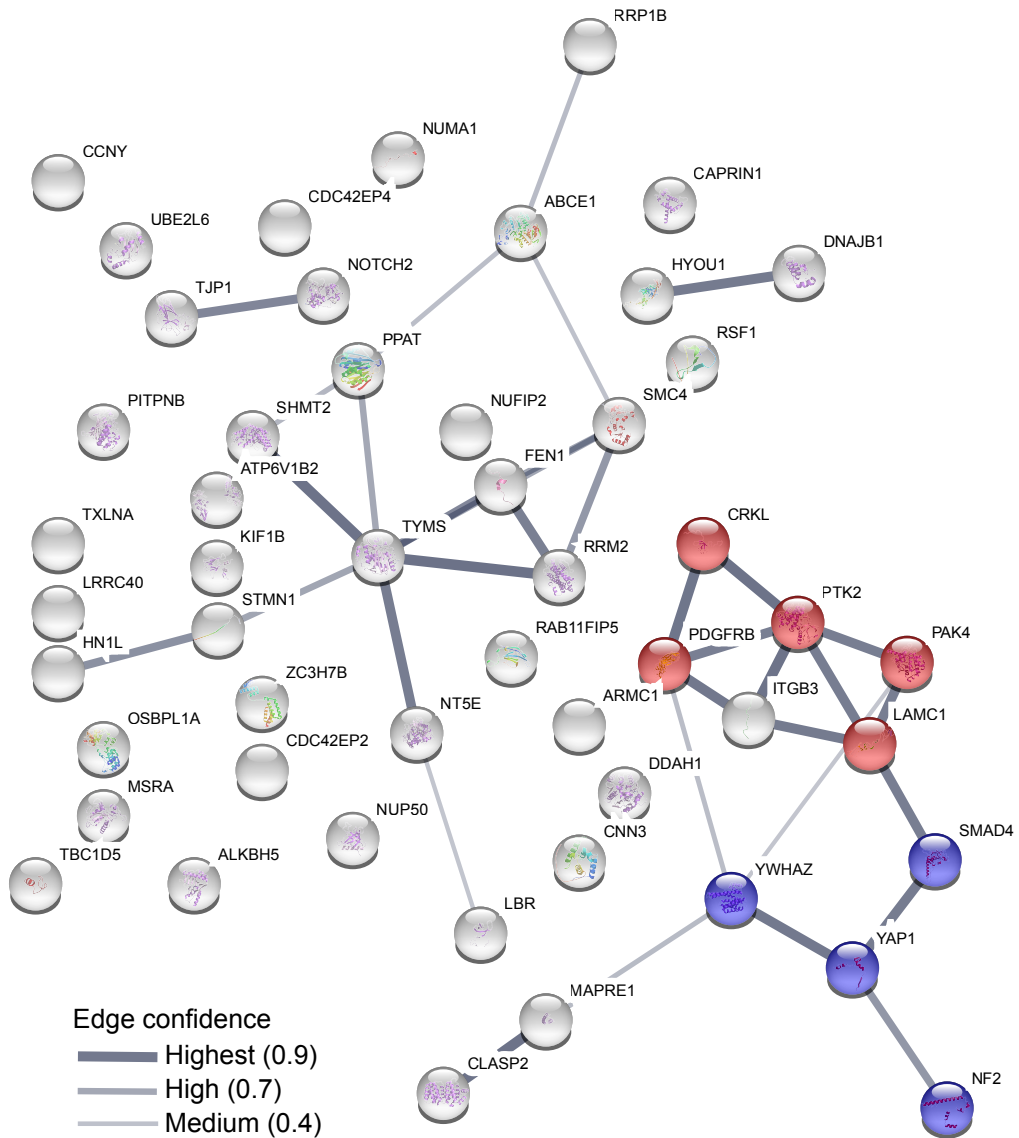

**Figure S1. Protein-protein interaction network of putative miR-193b targets.** STRING analysis was to construct interaction network among the 50 putative miR-193b targets identified previously<sup>12</sup>. STRING interactions with a confidence score of 0.4 or higher are shown and

highlighted in bold. Significantly interacting pathways are listed in the table; colors indicate related protein nodes.

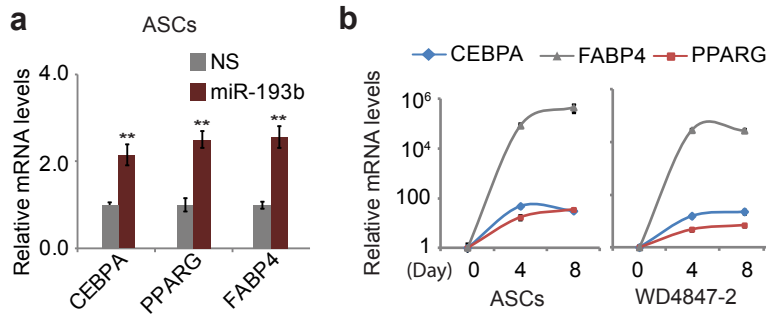

**Figure S2.** Adipogenic differentiation of ASCs and WD4847-2 cells. **a**, Effects of miR-193b on adipogenic differentiation marker mRNA levels during ASC differentiation. **b**, mRNA levels of differentiation markers during adipogenic differentiation in ASCs and WD4847-2 cells, as detected by qRT-PCR.

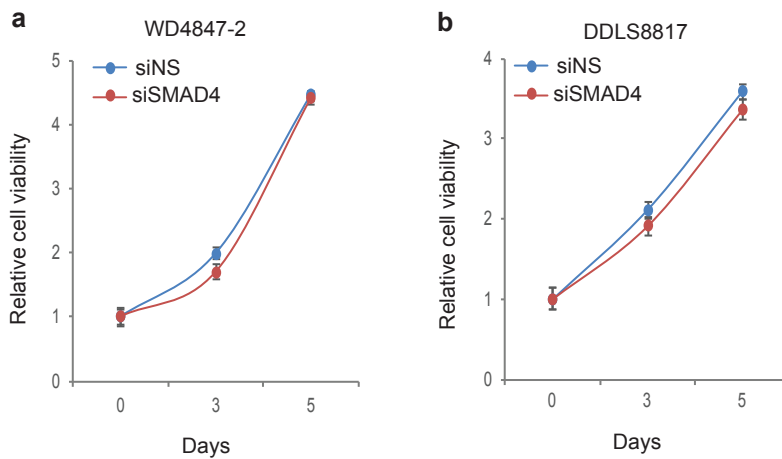

**Figure S3.** Knockdown of SMAD4 does not affect WDLs and DDLS cell proliferation. Cell proliferation was assessed at day 3 and day 5, after siRNA transfection in WD4847-2 (**a**) and DD8817 (**b**) cells. Values represent the mean  $\pm$  SE of 3 independent experiments.

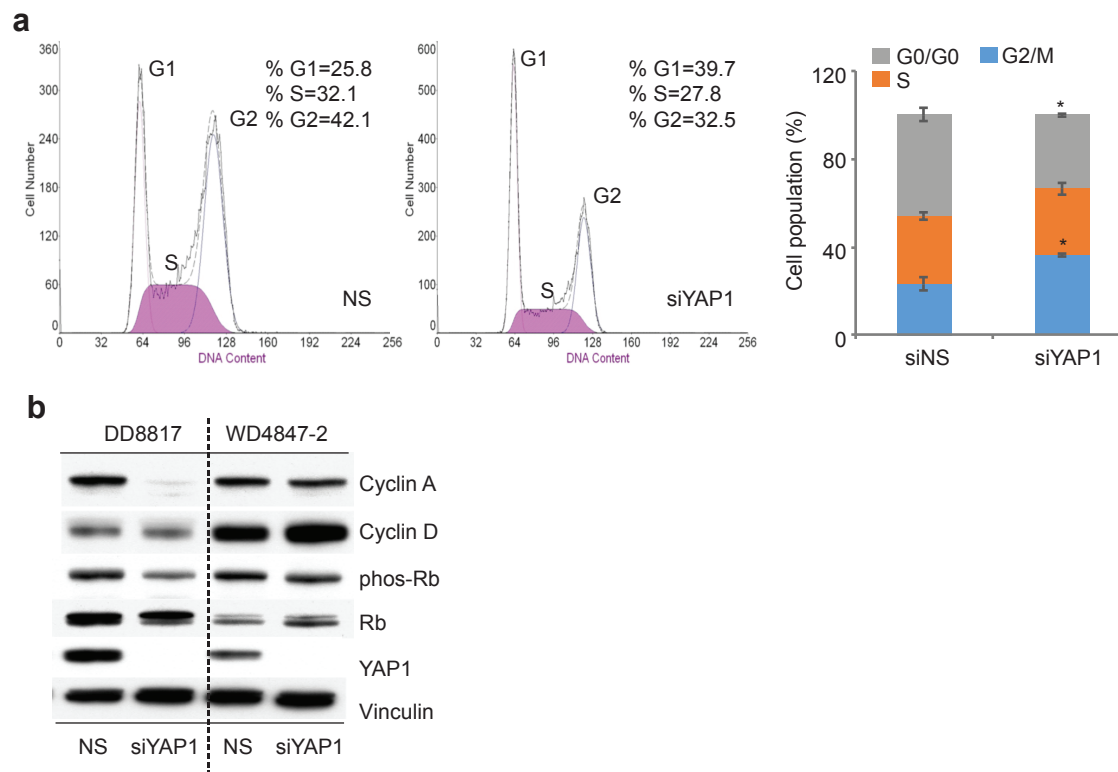

**Figure S4. Knockdown of YAP1 by siRNA induces modest cell cycle arrest at G0/G1 in DDLS cells.** **a**, Cell cycle FACS analysis was performed after 48h transfection with siRNAs. NS, nonspecific siRNA. Values represent the mean  $\pm$  SE of 3 independent experiments. \*,  $p < 0.05$ . **b**, Protein expression of cell cycle markers detected by Western blotting in siRNA-treated DDLS cells (representative results from 2 independent experiments).

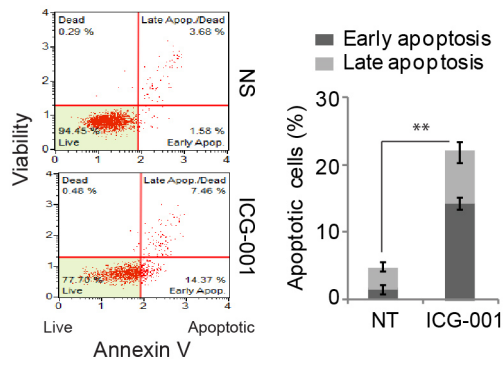

**Figure S5. IC-001 induces apoptosis in DDLS cells.** Apoptosis was detected in IC-001 (2.5  $\mu$ M)-treated DD8817 cells by annexin V assay on day 2. Representative apoptosis profiling panels are shown. Values represent the mean  $\pm$  SE of 3 independent experiments. \*\*,  $p < 0.01$  compared with vehicle or nonspecific miRNA or siRNA control.

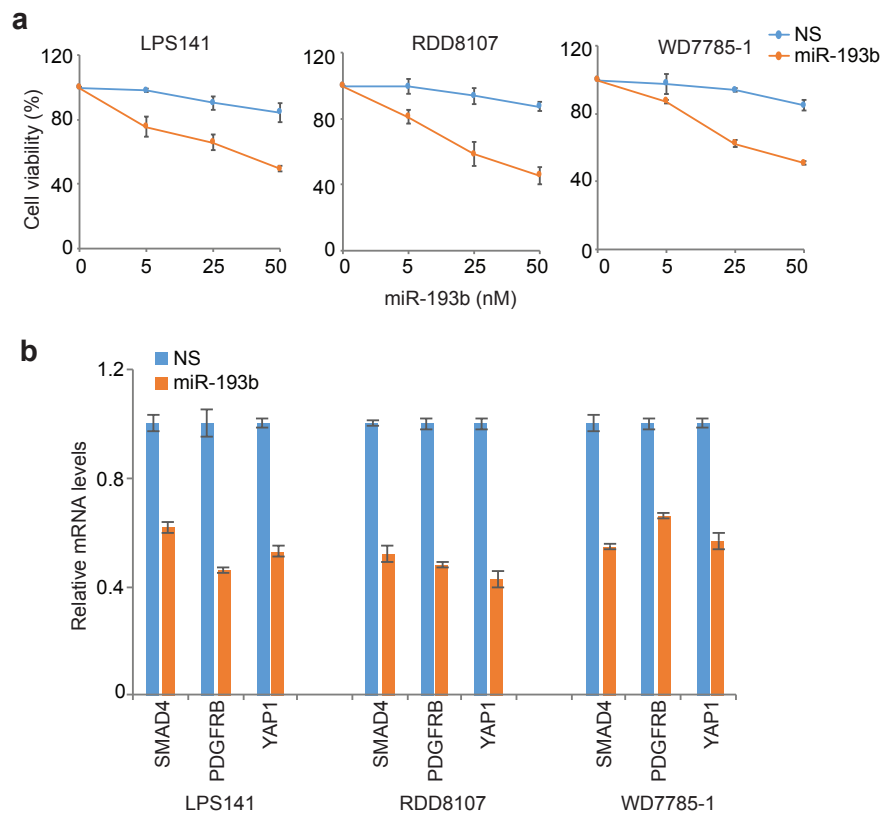

**Figure S6. miR-193b slows growth of cells that express intermediate levels of miR-193b.**

The selected cell lines were previously shown to express miR-193b at levels between those of ASCs and the cell lines used in preceding experiments<sup>12</sup>. **a**, Proliferation of liposarcoma cells on day 5 after transfection with varying doses of miR-193b. **b**, Expression of miR-193b targets was evaluated by qRT-PCR after 3 days of transfection with miR-193b. Values represent the mean  $\pm$  SE of 3 independent experiments.

**a** Full blots for Fig. 4F

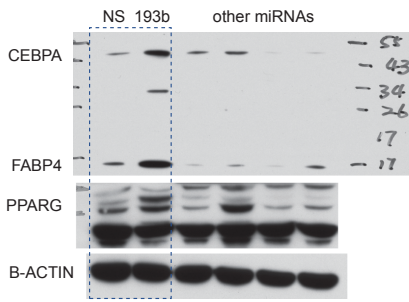

**b** Full blots for Fig. 4G

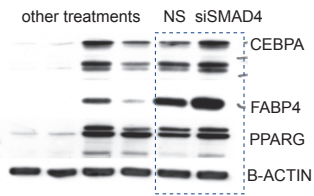

**c** Full blots for Fig. 4I

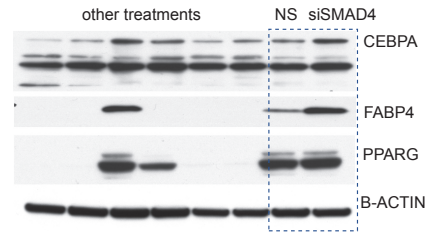

**d**

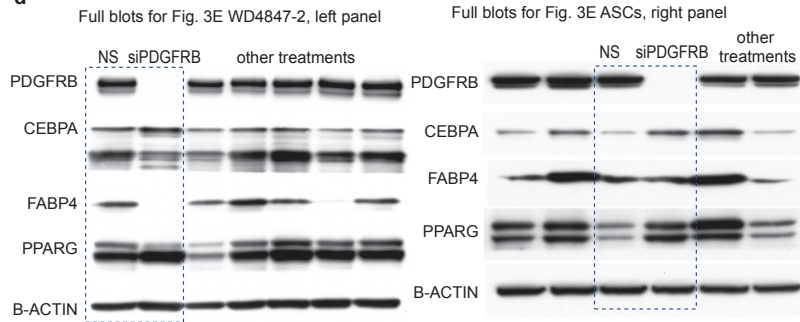

**f** Full blots for Fig. 5C

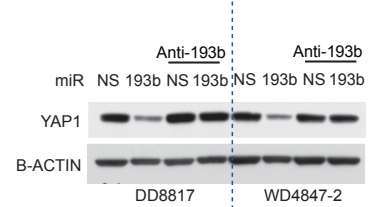

**Figure S7.** Full western blots for all figures.

**Table S1. Oligonucleotide sequences for 3'UTR reporters, RT-PCR primers, and miRNAs.**

**Cloning primers for 3'UTR reporters**

| <b>Reporter</b> | <b>Sequence</b>                                                                                                 |
|-----------------|-----------------------------------------------------------------------------------------------------------------|
| YAP1-WT         | AAACTAGCGGCCGCAGCTACTTGGAAGGAGTGCCTATAATTTGCCAGTAGCCACAGAGCTACTTGGAAGGAGTGCCTATAATTTGCCAGTAGCCACA<br>GT         |
| YAP1-WT as      | CTAGACTGTGGCTACTGGCAAATTATAGGCACTCCTTCCAAGTAGCTCTGTGGCTACTGGCAAATTATAGGCACTCCTTCCAAGTAGCTGCGGCCGC<br>TAGTTT     |
| YAP1-Mut        | AAACTAGCGGCCGCAGCTACTTGGAAGGAGTGCCTATAATTTGCATATAGCCACAGAGCTACTTGGAAGGAGTGCCTATAATTTGCATATAGCCACA<br>GT         |
| YAP1-Mut as     | CTAGACTGTGGCTATATGCAAATTATAGGCACTCCTTCCAAGTAGCTCTGTGGCTATATGCAAATTATAGGCACTCCTTCCAAGTAGCTGCGGCCGCT<br>AGTTT     |
| SMAD4-WT        | AAACTAGCGGCCGCCCACTCGTAGCTTCTGCTTTGGGGACAACCTGGTCAGTTGAAACCACTCGTAGCTTCTGCTTTGGGGACAACCTGGTCAGTTGAA<br>AT       |
| SMAD4-WT as     | CTAGATTTCAACTGACCAGTTGTCCCAAAGCAGAAGCTACGAGTGGTTTCAACTGACCAGTTGTCCCAAAGCAGAAGCTACGAGTGGGCGGCCG<br>CTAGTTT       |
| SMAD4-Mut       | AAACTAGCGGCCGCCCACTCGTAGCTTCTGCTTTTCTAACAACCTCATGCATTGAAACCACTCGTAGCTTCTGCTTTTCTAACAACCTCATGCATTGAAAT           |
| SMAD4-Mut as    | CTAGATTTCAATGCATGAGTTGTTAGGAAAGCAGAAGCTACGAGTGGTTTCAATGCATGAGTTGTTAGGAAAGCAGAAGCTACGAGTGGGCGGCCGC<br>TAGTTT     |
| PDGFRB-WT       | AAACTAGCGGCCGCATGTGCCAGTGTGGAGTGGCCACGTGTGTGTGCCAGTATATGATGTGCCAGTGTGGAGTGGCCACGTGTGTGTGCCAGTATA<br>TGT         |
| PDGFRB-WT-as    | CTAGCTAGACATATACTGGCACACACACGTGGCCACTCCACACTGGCACATCATATACTGGCACACACACGTGGCCACTCCACACTGGCACATGCG<br>GCCGCTAGTTT |
| PDGFRB-WT       | AAACTAGCGGCCGCATGTGCCAGTGTGGAGTGGCCACGTGTGTGTGCATGGCATATGATGTGCCAGTGTGGAGTGGCCACGTGTGTGTGCATGGCATA<br>TGT       |
| PDGFRB-WT-as    | CTAGACATATGCCATGACACACACGTGGCCACTCCACACTGGCACATCATATGCCATGACACACACGTGGCCACTCCACACTGGCACATGCGGCCG<br>CTAGTTT     |

**Taqman primers**

| <b>Primer</b> | <b>Assay ID (from Thermo Fisher Scientific)</b> |
|---------------|-------------------------------------------------|
| SMAD4         | Hs00929647_m1                                   |
| PDGFRB        | Hs01019589_m1                                   |
| YAP1          | Hs00902712_g1                                   |
| BIRC5         | Hs04194392_s1                                   |
| PTTG          | Hs00747713_sH                                   |
| CEBPA         | Hs00269972_s1                                   |
| PPARG         | Hs00234592_m1                                   |
| FABP4         | Hs00609791_m1                                   |
| GAPDH         | Hs99999905_m1                                   |

**miRNA primers:**

| <b>Primer</b> | <b>Sequence</b>        |
|---------------|------------------------|
| miR-193b-3p   | AACTGGCCCTCAAAGTCCCGCT |
